# Supplementary material
Source: publisher site journal article supplement (https://www.spandidos-publications.com/1286/downloadSupplementary)
Supplement: Supplementary file 1 [file downloadSupplementary]

## Sheet: Supplementary Table S1
	Table SIII. Proteins identified by mass spectrometry.
		Identified proteins	Accession no. Symbol	Alternate ID	MW (kDa)
	1	Neuroblast differentiation-associated protein AHNAK	AHNK_HUMAN	AHNAK	629
	2	Plectin	PLEC_HUMAN	PLEC	532
	3	Basement membrane-specific heparan sulfate proteoglycan core protein	PGBM_HUMAN	HSPG2	469
	4	Extracellular matrix protein FRAS1	FRAS1_HUMAN	FRAS1	443
	5	Laminin subunit alpha-3	LAMA3_HUMAN	LAMA3	367
	6	Spectrin alpha chain, non-erythrocytic 1	SPTN1_HUMAN	SPTAN1	285
	7	Filamin-A	FLNA_HUMAN	FLNA	281
	8	Filamin-B	FLNB_HUMAN	FLNB	278
	9	Spectrin beta chain, non-erythrocytic 1	SPTB2_HUMAN	SPTBN1	275
	10	Cation-independent mannose-6-phosphate receptor	MPRI_HUMAN	IGF2R	274
	11	Fatty acid synthase	FAS_HUMAN	FASN	273
	12	Sortilin-related receptor	SORL_HUMAN	SORL1	248
	13	CAD protein	PYR1_HUMAN	CAD	243
	14	Myosin-9	MYH9_HUMAN	MYH9	227
	15	Agrin	AGRIN_HUMAN	AGRN	217
	16	Receptor-type tyrosine-protein phosphatase F	PTPRF_HUMAN	PTPRF	213
	17	Nascent polypeptide-associated complex subunit alpha, muscle-specific form	NACAM_HUMAN	NACA	205
	18	Periplakin	PEPL_HUMAN	PPL	205
	19	Integrin beta-4	ITB4_HUMAN	ITGB4	202
	20	Laminin subunit beta-1	LAMB1_HUMAN	LAMB1	198
	21	InaD-like protein	INADL_HUMAN	PATJ	196
	22	Tight junction protein ZO-1	ZO1_HUMAN	TJP1	195
	23	Clathrin heavy chain 1	CLH1_HUMAN	CLTC	192
	24	Ras GTPase-activating-like protein IQGAP1	IQGA1_HUMAN	IQGAP1	189
	25	Laminin subunit gamma-1	LAMC1_HUMAN	LAMC1	178
	26	Eukaryotic translation initiation factor 4 gamma 1	IF4G1_HUMAN	EIF4G1	175
	27	Peroxidasin homolog	PXDN_HUMAN	PXDN	165
	28	Receptor-type tyrosine-protein phosphatase kappa	PTPRK_HUMAN	PTPRK	162
	29	CD109 antigen	CD109_HUMAN	CD109	162
	30	Attractin	ATRN_HUMAN	ATRN	159
	31	Kinectin	KTN1_HUMAN	KTN1	156
	32	Hepatocyte growth factor receptor	MET_HUMAN	MET	156
	33	Ribosome-binding protein 1	RRBP1_HUMAN	RRBP1	152
	34	ATP-dependent RNA helicase A	DHX9_HUMAN	DHX9	141
	35	Neural cell adhesion molecule L1	L1CAM_HUMAN	L1CAM	140
	36	Complement factor H	CFAH_HUMAN	CFH	139
	37	G-protein coupled receptor 126	GP126_HUMAN	GPR126	137
	38	Cullin-associated NEDD8-dissociated protein 1	CAND1_HUMAN	CAND1	136
	39	Splicing factor 3B subunit 3	SF3B3_HUMAN	SF3B3	136
	40	Golgi apparatus protein 1	GSLG1_HUMAN	GLG1	135
	41	Tight junction protein ZO-2	ZO2_HUMAN	TJP2	134
	42	Protein jagged-1	JAG1_HUMAN	JAG1	134
	43	Nardilysin	NRDC_HUMAN	NRDC	132
	44	Laminin subunit gamma-2	LAMC2_HUMAN	LAMC2	131
	45	Reticulon-4	RTN4_HUMAN	RTN4	130
	46	Laminin subunit beta-3	LAMB3_HUMAN	LAMB3	130
	47	Thrombospondin-1	TSP1_HUMAN	THBS1	129
	48	Integrin alpha-2	ITA2_HUMAN	ITGA2	129
	49	DNA damage-binding protein 1	DDB1_HUMAN	DDB1	127
	50	Integrin alpha-6	ITA6_HUMAN	ITGA6	127
	51	Arf-GAP with GTPase, ANK repeat and PH domain-containing protein 2	AGAP2_HUMAN	AGAP2	125
	52	Vinculin	VINC_HUMAN	VCL	124
	53	Importin-5	IPO5_HUMAN	IPO5	124
	54	Exportin-1	XPO1_HUMAN	XPO1	123
	55	Extended synaptotagmin-1	ESYT1_HUMAN	ESYT1	123
	56	Desmoglein-2	DSG2_HUMAN	DSG2	122
	57	Microtubule-associated protein 4	MAP4_HUMAN	MAP4	121
	58	ATP-citrate synthase	ACLY_HUMAN	ACLY	121
	59	Importin-7	IPO7_HUMAN	IPO7	120
	60	Inactive tyrosine-protein kinase 7	PTK7_HUMAN	PTK7	118
	61	Ubiquitin-like modifier-activating enzyme 1	UBA1_HUMAN	UBA1	118
	62	Ephrin type-B receptor 2	EPHB2_HUMAN	EPHB2	117
	63	Oral-facial-digital syndrome 1 protein	OFD1_HUMAN	OFD1	117
	64	Integrin alpha-3	ITA3_HUMAN	ITGA3	117
	65	Integrin alpha-V	ITAV_HUMAN	ITGAV	116
	66	Protocadherin-1	PCDH1_HUMAN	PCDH1	115
	67	Cysteine-rich motor neuron 1 protein	CRIM1_HUMAN	CRIM1	114
	68	Sodium/potassium-transporting ATPase subunit alpha-1	AT1A1_HUMAN	ATP1A1	113
	69	Bone morphogenetic protein 1	BMP1_HUMAN	BMP1	111
	70	Guanine nucleotide-binding protein G(s) subunit alpha isoforms Xlas	GNAS1_HUMAN	GNAS	111
	71	Oncostatin-M-specific receptor subunit beta	OSMR_HUMAN	OSMR	111
	72	Exportin-2	XPO2_HUMAN	CSE1L	110
	73	Transmembrane protein 132A	T132A_HUMAN	TMEM132A	110
	74	Calsyntenin-1	CSTN1_HUMAN	CLSTN1	110
	75	Collagen alpha-1(VI) chain	CO6A1_HUMAN	COL6A1	109
	76	Catenin delta-1	CTND1_HUMAN	CTNND1	108
	77	General vesicular transport factor p115	USO1_HUMAN	USO1	108
	78	Ephrin type-A receptor 2	EPHA2_HUMAN	EPHA2	108
	79	Ephrin type-B receptor 4	EPHB4_HUMAN	EPHB4	108
	80	Coatomer subunit beta	COPB_HUMAN	COPB1	107
	81	Neutral alpha-glucosidase AB	GANAB_HUMAN	GANAB	107
	82	Alanine--tRNA ligase, cytoplasmic	SYAC_HUMAN	AARS	107
	83	Calsyntenin-3	CSTN3_HUMAN	CLSTN3	106
	84	26S proteasome non-ATPase regulatory subunit 1	PSMD1_HUMAN	PSMD1	106
	85	Eukaryotic translation initiation factor 3 subunit C	EIF3C_HUMAN	EIF3C	105
	86	Alpha-actinin-4	ACTN4_HUMAN	ACTN4	105
	87	AP-1 complex subunit beta-1	AP1B1_HUMAN	AP1B1	105
	88	AP-2 complex subunit beta	AP2B1_HUMAN	AP2B1	105
	89	Puromycin-sensitive aminopeptidase	PSA_HUMAN	NPEPPS	103
	90	Neuropilin-1	NRP1_HUMAN	NRP1	103
	91	Scaffold attachment factor B1	SAFB1_HUMAN	SAFB	103
	92	Alpha-actinin-1	ACTN1_HUMAN	ACTN1	103
	93	Alpha-actinin-3	ACTN3_HUMAN	ACTN3	103
	94	Coatomer subunit beta'	COPB2_HUMAN	COPB2	102
	95	Transportin-1	TNPO1_HUMAN	TNPO1	102
	96	Staphylococcal nuclease domain-containing protein 1	SND1_HUMAN	SND1	102
	97	DNA replication licensing factor MCM2	MCM2_HUMAN	MCM2	102
	98	C-1-tetrahydrofolate synthase, cytoplasmic	C1TC_HUMAN	MTHFD1	102
	99	N-alpha-acetyltransferase 15, NatA auxiliary subunit	NAA15_HUMAN	NAA15	101
	100	Epithelial discoidin domain-containing receptor 1	DDR1_HUMAN	DDR1	101
	101	Splicing factor 3B subunit 2	SF3B2_HUMAN	SF3B2	100
	102	26S proteasome non-ATPase regulatory subunit 2	PSMD2_HUMAN	PSMD2	100
	103	Catenin alpha-1	CTNA1_HUMAN	CTNNA1	100
	104	Desmocollin-2	DSC2_HUMAN	DSC2	100
	105	Cadherin-2	CADH2_HUMAN	CDH2	100
	106	Tyrosine-protein kinase receptor UFO	UFO_HUMAN	AXL	98
	107	Seizure 6-like protein 2	SE6L2_HUMAN	SEZ6L2	98
	108	Cadherin-1	CADH1_HUMAN	CDH1	97
	109	Dystroglycan	DAG1_HUMAN	DAG1	97
	110	Importin subunit beta-1	IMB1_HUMAN	KPNB1	97
	111	Heat shock protein 105 kDa	HS105_HUMAN	HSPH1	97
	112	Glycogen phosphorylase, brain form	PYGB_HUMAN	PYGB	97
	113	DNA replication licensing factor MCM4	MCM4_HUMAN	MCM4	97
	114	Programmed cell death 6-interacting protein	PDC6I_HUMAN	PDCD6IP	96
	115	Ubiquitin carboxyl-terminal hydrolase 5	UBP5_HUMAN	USP5	96
	116	Heterogeneous nuclear ribonucleoprotein U-like protein 1	HNRL1_HUMAN	HNRNPUL1	96
	117	Low-density lipoprotein receptor	LDLR_HUMAN	LDLR	95
	118	Elongation factor 2	EF2_HUMAN	EEF2	95
	119	Interleukin enhancer-binding factor 3	ILF3_HUMAN	ILF3	95
	120	Suppressor of tumorigenicity 14 protein	ST14_HUMAN	ST14	95
	121	Matrin-3	MATR3_HUMAN	MATR3	95
	122	Heat shock 70 kDa protein 4	HSP74_HUMAN	HSPA4	94
	123	Breast cancer anti-estrogen resistance protein 1	BCAR1_HUMAN	BCAR1	93
	124	CUB domain-containing protein 1	CDCP1_HUMAN	CDCP1	93
	125	DNA replication licensing factor MCM6	MCM6_HUMAN	MCM6	93
	126	Semaphorin-4C	SEM4C_HUMAN	SEMA4C	93
	127	Disintegrin and metalloproteinase domain-containing protein 15	ADA15_HUMAN	ADAM15	93
	128	Disintegrin and metalloproteinase domain-containing protein 17	ADA17_HUMAN	ADAM17	93
	129	Eukaryotic translation initiation factor 3 subunit B	EIF3B_HUMAN	EIF3B	92
	130	Endoplasmin	ENPL_HUMAN	HSP90B1	92
	131	Semaphorin-4B	SEM4B_HUMAN	SEMA4B	92
	132	Vacuolar protein sorting-associated protein 35	VPS35_HUMAN	VPS35	92
	133	Cadherin-3	CADH3_HUMAN	CDH3	91
	134	DNA replication licensing factor MCM3	MCM3_HUMAN	MCM3	91
	135	Heterogeneous nuclear ribonucleoprotein U	HNRPU_HUMAN	HNRNPU	91
	136	Disintegrin and metalloproteinase domain-containing protein 9	ADAM9_HUMAN	ADAM9	91
	137	Transitional endoplasmic reticulum ATPase	TERA_HUMAN	VCP	89
	138	Leucine-rich repeat flightless-interacting protein 1	LRRF1_HUMAN	LRRFIP1	89
	139	Semaphorin-3A	SEM3A_HUMAN	SEMA3A	89
	140	Disintegrin and metalloproteinase domain-containing protein 8	ADAM8_HUMAN	ADAM8	89
	141	Transcription intermediary factor 1-beta	TIF1B_HUMAN	TRIM28	89
	142	Integrin beta-1	ITB1_HUMAN	ITGB1	88
	143	Amyloid-like protein 2	APLP2_HUMAN	APLP2	87
	144	Amyloid beta A4 protein	A4_HUMAN	APP	87
	145	Lysyl oxidase homolog 2	LOXL2_HUMAN	LOXL2	87
	146	Protein transport protein Sec23B	SC23B_HUMAN	SEC23B	86
	147	Gelsolin	GELS_HUMAN	GSN	86
	148	ATP-dependent 6-phosphofructokinase, platelet type	PFKAP_HUMAN	PFKP	86
	149	Catenin beta-1	CTNB1_HUMAN	CTNNB1	85
	150	Nuclear autoantigenic sperm protein	NASP_HUMAN	NASP	85
	151	Heterogeneous nuclear ribonucleoprotein U-like protein 2	HNRL2_HUMAN	HNRNPUL2	85
	152	Transferrin receptor protein 1	TFR1_HUMAN	TFRC	85
	153	Procollagen-lysine,2-oxoglutarate 5-dioxygenase 3	PLOD3_HUMAN	PLOD3	85
	154	Heat shock protein HSP 90-alpha	HS90A_HUMAN	HSP90AA1	85
	155	Disintegrin and metalloproteinase domain-containing protein 10	ADA10_HUMAN	ADAM10	84
	156	Niban-like protein 1	NIBL1_HUMAN	FAM129B	84
	157	Procollagen-lysine,2-oxoglutarate 5-dioxygenase 1	PLOD1_HUMAN	PLOD1	84
	158	Threonine--tRNA ligase, cytoplasmic	SYTC_HUMAN	TARS	83
	159	Heat shock protein HSP 90-beta	HS90B_HUMAN	HSP90AB1	83
	160	Glycine--tRNA ligase	SYG_HUMAN	GARS	83
	161	X-ray repair cross-complementing protein 5	XRCC5_HUMAN	XRCC5	83
	162	Dipeptidyl peptidase 3	DPP3_HUMAN	DPP3	83
	163	Sulfhydryl oxidase 1	QSOX1_HUMAN	QSOX1	83
	164	Calpain-1 catalytic subunit	CAN1_HUMAN	CAPN1	82
	165	Junction plakoglobin	PLAK_HUMAN	JUP	82
	166	DNA replication licensing factor MCM7	MCM7_HUMAN	MCM7	81
	167	Acylamino-acid-releasing enzyme	ACPH_HUMAN	APEH	81
	168	FACT complex subunit SSRP1	SSRP1_HUMAN	SSRP1	81
	169	Prolyl endopeptidase	PPCE_HUMAN	PREP	81
	170	1,4-alpha-glucan-branching enzyme	GLGB_HUMAN	GBE1	80
	171	Probable ATP-dependent RNA helicase DDX17	DDX17_HUMAN	DDX17	80
	172	Calpain-2 catalytic subunit	CAN2_HUMAN	CAPN2	80
	173	Frizzled-6	FZD6_HUMAN	FZD6	79
	174	Thimet oligopeptidase	THOP1_HUMAN	THOP1	79
	175	Caprin-1	CAPR1_HUMAN	CAPRIN1	78
	176	Lactotransferrin	TRFL_HUMAN	LTF	78
	177	Protein-glutamine gamma-glutamyltransferase 2	TGM2_HUMAN	TGM2	77
	178	Serotransferrin	TRFE_HUMAN	TF	77
	179	GMP synthase [glutamine-hydrolyzing]	GUAA_HUMAN	GMPS	77
	180	Nucleolin	NUCL_HUMAN	NCL	77
	181	Calpastatin	ICAL_HUMAN	CAST	77
	182	Splicing factor, proline- and glutamine-rich	SFPQ_HUMAN	SFPQ	76
	183	N-acetylgalactosaminyltransferase 7	GALT7_HUMAN	GALNT7	75
	184	Arginine--tRNA ligase, cytoplasmic	SYRC_HUMAN	RARS	75
	185	Semaphorin-7A	SEM7A_HUMAN	SEMA7A	75
	186	Transforming growth factor-beta-induced protein ig-h3	BGH3_HUMAN	TGFBI	75
	187	Proprotein convertase subtilisin/kexin type 9	PCSK9_HUMAN	PCSK9	74
	188	Prelamin-A/C	LMNA_HUMAN	LMNA	74
	189	T-box brain protein 1	TBR1_HUMAN	TBR1	74
	190	SH3 domain-containing kinase-binding protein 1	SH3K1_HUMAN	SH3KBP1	73
	191	Far upstream element-binding protein 2	FUBP2_HUMAN	KHSRP	73
	192	Protein disulfide-isomerase A4	PDIA4_HUMAN	PDIA4	73
	193	Glutamate--cysteine ligase catalytic subunit	GSH1_HUMAN	GCLC	73
	194	Aminopeptidase B	AMPB_HUMAN	RNPEP	73
	195	78 kDa glucose-regulated protein	GRP78_HUMAN	HSPA5	72
	196	Tumor necrosis factor receptor superfamily member 21	TNR21_HUMAN	TNFRSF21	72
	197	Vasorin	VASN_HUMAN	VASN	72
	198	Cell surface glycoprotein MUC18	MUC18_HUMAN	MCAM	72
	199	Lipolysis-stimulated lipoprotein receptor	LSR_HUMAN	LSR	71
	200	Drebrin	DREB_HUMAN	DBN1	71
	201	SUMO-activating enzyme subunit 2	SAE2_HUMAN	UBA2	71
	202	Heterogeneous nuclear ribonucleoprotein R	HNRPR_HUMAN	HNRNPR	71
	203	Thioredoxin reductase 1, cytoplasmic	TRXR1_HUMAN	TXNRD1	71
	204	Heat shock cognate 71 kDa protein	HSP7C_HUMAN	HSPA8	71
	205	Plastin-3	PLST_HUMAN	PLS3	71
	206	Polyadenylate-binding protein 1	PABP1_HUMAN	PABPC1	71
	207	Polyadenylate-binding protein 4	PABP4_HUMAN	PABPC4	71
	208	Heat shock 70 kDa protein 1A	HS71A_HUMAN	HSPA1A	70
	209	Lamin-B2	LMNB2_HUMAN	LMNB2	70
	210	Xaa-Pro aminopeptidase 1	XPP1_HUMAN	XPNPEP1	70
	211	X-ray repair cross-complementing protein 6	XRCC6_HUMAN	XRCC6	70
	212	Heterogeneous nuclear ribonucleoprotein Q	HNRPQ_HUMAN	SYNCRIP	70
	213	Plastin-1	PLSI_HUMAN	PLS1	70
	214	Plastin-2	PLSL_HUMAN	LCP1	70
	215	Ezrin	EZRI_HUMAN	EZR	69
	216	Serum albumin	ALBU_HUMAN	ALB	69
	217	Leukotriene A-4 hydrolase	LKHA4_HUMAN	LTA4H	69
	218	Eukaryotic translation initiation factor 4B	IF4B_HUMAN	EIF4B	69
	219	Polypeptide N-acetylgalactosaminyltransferase 10	GLT10_HUMAN	GALNT10	69
	220	Radixin	RADI_HUMAN	RDX	69
	221	RNA-binding protein EWS	EWS_HUMAN	EWSR1	68
	222	Splicing factor 1	SF01_HUMAN	SF1	68
	223	Replication protein A 70 kDa DNA-binding subunit	RFA1_HUMAN	RPA1	68
	224	Lysine--tRNA ligase	SYK_HUMAN	KARS	68
	225	4F2 cell-surface antigen heavy chain	4F2_HUMAN	SLC3A2	68
	226	Transketolase	TKT_HUMAN	TKT	68
	227	Moesin	MOES_HUMAN	MSN	68
	228	Calnexin	CALX_HUMAN	CANX	68
	229	Far upstream element-binding protein 1	FUBP1_HUMAN	FUBP1	68
	230	Basal cell adhesion molecule	BCAM_HUMAN	BCAM	67
	231	ATP-binding cassette sub-family E member 1	ABCE1_HUMAN	ABCE1	67
	232	Apoptosis-inducing factor 1, mitochondrial	AIFM1_HUMAN	AIFM1	67
	233	NudC domain-containing protein 1	NUDC1_HUMAN	NUDCD1	67
	234	Eukaryotic translation initiation factor 3 subunit L	EIF3L_HUMAN	EIF3L	67
	235	Lamin-B1	LMNB1_HUMAN	LMNB1	66
	236	WD repeat-containing protein 1	WDR1_HUMAN	WDR1	66
	237	Keratin, type II cytoskeletal 1	K2C1_HUMAN	KRT1	66
	238	Keratin, type II cytoskeletal 2 epidermal	K22E_HUMAN	KRT2	65
	239	Septin-9	SEPT9_HUMAN	2016-09-09	65
	240	Galectin-3-binding protein	LG3BP_HUMAN	LGALS3BP	65
	241	Serine/threonine-protein phosphatase 2A 65 kDa regulatory subunit A alpha isoform	2AAA_HUMAN	PPP2R1A	65
	242	CD166 antigen	CD166_HUMAN	ALCAM	65
	243	Hyaluronan synthase 1	HYAS1_HUMAN	HAS1	65
	244	Polypeptide N-acetylgalactosaminyltransferase 2	GALT2_HUMAN	GALNT2	65
	245	Bifunctional purine biosynthesis protein PURH	PUR9_HUMAN	ATIC	65
	246	Paxillin	PAXI_HUMAN	PXN	65
	247	NADP-dependent malic enzyme	MAOX_HUMAN	ME1	64
	248	Heterogeneous nuclear ribonucleoprotein L	HNRPL_HUMAN	HNRNPL	64
	249	Protein LYRIC	LYRIC_HUMAN	MTDH	64
	250	Ran GTPase-activating protein 1	RAGP1_HUMAN	RANGAP1	64
	251	Granulins	GRN_HUMAN	GRN	64
	252	5'-nucleotidase	5NTD_HUMAN	NT5E	63
	253	Glucose-6-phosphate isomerase	G6PI_HUMAN	GPI	63
	254	Beta-hexosaminidase subunit beta	HEXB_HUMAN	HEXB	63
	255	Asparagine--tRNA ligase, cytoplasmic	SYNC_HUMAN	NARS	63
	256	Stress-induced-phosphoprotein 1	STIP1_HUMAN	STIP1	63
	257	Dihydropyrimidinase-related protein 2	DPYL2_HUMAN	DPYSL2	62
	258	Keratin, type I cytoskeletal 9	K1C9_HUMAN	KRT9	62
	259	Iduronate 2-sulfatase	IDS_HUMAN	IDS	62
	260	Glypican-1	GPC1_HUMAN	GPC1	62
	261	Src substrate cortactin	SRC8_HUMAN	CTTN	62
	262	TATA-binding protein-associated factor 2N	RBP56_HUMAN	TAF15	62
	263	Phosphoglucomutase-1	PGM1_HUMAN	PGM1	61
	264	Glutamate dehydrogenase 1, mitochondrial	DHE3_HUMAN	GLUD1	61
	265	Zyxin	ZYX_HUMAN	ZYX	61
	266	60 kDa heat shock protein, mitochondrial	CH60_HUMAN	HSPD1	61
	267	Beta-hexosaminidase subunit alpha	HEXA_HUMAN	HEXA	61
	268	EH domain-containing protein 1	EHD1_HUMAN	EHD1	61
	269	T-complex protein 1 subunit gamma	TCPG_HUMAN	CCT3	61
	270	26S proteasome non-ATPase regulatory subunit 3	PSMD3_HUMAN	PSMD3	61
	271	T-complex protein 1 subunit alpha	TCPA_HUMAN	TCP1	60
	272	Thrombomodulin	TRBM_HUMAN	THBD	60
	273	Importin subunit alpha-5	IMA5_HUMAN	KPNA1	60
	274	Oncoprotein-induced transcript 3 protein	OIT3_HUMAN	OIT3	60
	275	Poly(U)-binding-splicing factor PUF60	PUF60_HUMAN	PUF60	60
	276	T-complex protein 1 subunit epsilon	TCPE_HUMAN	CCT5	60
	277	T-complex protein 1 subunit theta	TCPQ_HUMAN	CCT8	60
	278	Glucosidase 2 subunit beta	GLU2B_HUMAN	PRKCSH	59
	279	T-complex protein 1 subunit eta	TCPH_HUMAN	CCT7	59
	280	Protein phosphatase 1G	PPM1G_HUMAN	PPM1G	59
	281	Glucose-6-phosphate 1-dehydrogenase	G6PD_HUMAN	G6PD	59
	282	Apoptosis inhibitor 5	API5_HUMAN	API5	59
	283	Non-specific lipid-transfer protein	NLTP_HUMAN	SCP2	59
	284	Splicing factor 3A subunit 3	SF3A3_HUMAN	SF3A3	59
	285	Keratin, type I cytoskeletal 10	K1C10_HUMAN	KRT10	59
	286	Serine--tRNA ligase, cytoplasmic	SYSC_HUMAN	SARS	59
	287	Kunitz-type protease inhibitor 1	SPIT1_HUMAN	SPINT1	58
	288	Prosaposin	SAP_HUMAN	PSAP	58
	289	Serine/threonine-protein kinase PAK 2	PAK2_HUMAN	PAK2	58
	290	T-complex protein 1 subunit zeta	TCPZ_HUMAN	CCT6A	58
	291	Pyruvate kinase PKM	KPYM_HUMAN	PKM	58
	292	Amphoterin-induced protein 2	AMGO2_HUMAN	AMIGO2	58
	293	T-complex protein 1 subunit delta	TCPD_HUMAN	CCT4	58
	294	Nectin-2	NECT2_HUMAN	NECTIN2	58
	295	T-complex protein 1 subunit beta	TCPB_HUMAN	CCT2	57
	296	Histidine--tRNA ligase, cytoplasmic	SYHC_HUMAN	HARS	57
	297	Hydroxymethylglutaryl-CoA synthase, cytoplasmic	HMCS1_HUMAN	HMGCS1	57
	298	Polypyrimidine tract-binding protein 1	PTBP1_HUMAN	PTBP1	57
	299	Coatomer subunit delta	COPD_HUMAN	ARCN1	57
	300	Nectin-1	NECT1_HUMAN	NECTIN1	57
	301	Aspartate--tRNA ligase, cytoplasmic	SYDC_HUMAN	DARS	57
	302	Ladinin-1	LAD1_HUMAN	LAD1	57
	303	Protein disulfide-isomerase	PDIA1_HUMAN	P4HB	57
	304	UTP--glucose-1-phosphate uridylyltransferase	UGPA_HUMAN	UGP2	57
	305	Brain-specific angiogenesis inhibitor 1-associated protein 2-like protein 1	BI2L1_HUMAN	BAIAP2L1	57
	306	Serine/threonine-protein phosphatase 5	PPP5_HUMAN	PPP5C	57
	307	Protein disulfide-isomerase A3	PDIA3_HUMAN	PDIA3	57
	308	Glutathione reductase, mitochondrial	GSHR_HUMAN	GSR	56
	309	Cytosol aminopeptidase	AMPL_HUMAN	LAP3	56
	310	Protein RCC2	RCC2_HUMAN	RCC2	56
	311	Ubiquitin carboxyl-terminal hydrolase 14	UBP14_HUMAN	USP14	56
	312	Inosine-5'-monophosphate dehydrogenase 2	IMDH2_HUMAN	IMPDH2	56
	313	Eukaryotic peptide chain release factor GTP-binding subunit ERF3A	ERF3A_HUMAN	GSPT1	56
	314	Nicotinamide phosphoribosyltransferase	NAMPT_HUMAN	NAMPT	56
	315	Pre-mRNA-processing factor 19	PRP19_HUMAN	PRPF19	55
	316	Fumarate hydratase, mitochondrial	FUMH_HUMAN	FH	55
	317	Xaa-Pro dipeptidase	PEPD_HUMAN	PEPD	55
	318	Fascin	FSCN1_HUMAN	FSCN1	55
	319	Lysosomal protective protein	PPGB_HUMAN	CTSA	54
	320	ERO1-like protein alpha	ERO1A_HUMAN	ERO1A	54
	321	Coronin-1B	COR1B_HUMAN	CORO1B	54
	322	Non-POU domain-containing octamer-binding protein	NONO_HUMAN	NONO	54
	323	Dihydrolipoyl dehydrogenase, mitochondrial	DLDH_HUMAN	DLD	54
	324	Ras GTPase-activating protein-binding protein 2	G3BP2_HUMAN	G3BP2	54
	325	Solute carrier family 2, facilitated glucose transporter member 1	GTR1_HUMAN	SLC2A1	54
	326	Plasma alpha-L-fucosidase	FUCO2_HUMAN	FUCA2	54
	327	Nucleobindin-1	NUCB1_HUMAN	NUCB1	54
	328	4-trimethylaminobutyraldehyde dehydrogenase	AL9A1_HUMAN	ALDH9A1	54
	329	Keratin, type II cytoskeletal 8	K2C8_HUMAN	KRT8	54
	330	Vimentin	VIME_HUMAN	VIM	54
	331	Splicing factor U2AF 65 kDa subunit	U2AF2_HUMAN	U2AF2	54
	332	RNA-binding protein FUS	FUS_HUMAN	FUS	53
	333	Coronin-1C	COR1C_HUMAN	CORO1C	53
	334	Tryptophan--tRNA ligase, cytoplasmic	SYWC_HUMAN	WARS	53
	335	6-phosphogluconate dehydrogenase, decarboxylating	6PGD_HUMAN	PGD	53
	336	Sushi repeat-containing protein SRPX2	SRPX2_HUMAN	SRPX2	53
	337	Cytosolic non-specific dipeptidase	CNDP2_HUMAN	CNDP2	53
	338	26S proteasome non-ATPase regulatory subunit 12	PSD12_HUMAN	PSMD12	53
	339	Clusterin	CLUS_HUMAN	CLU	52
	340	Tubulointerstitial nephritis antigen-like	TINAL_HUMAN	TINAGL1	52
	341	Glutathione synthetase	GSHB_HUMAN	GSS	52
	342	Ras GTPase-activating protein-binding protein 1	G3BP1_HUMAN	G3BP1	52
	343	V-type proton ATPase subunit S1	VAS1_HUMAN	ATP6AP1	52
	344	Adenylyl cyclase-associated protein 1	CAP1_HUMAN	CAP1	52
	345	Dipeptidyl peptidase 1	CATC_HUMAN	CTSC	52
	346	5'-nucleotidase domain-containing protein 1	NT5D1_HUMAN	NT5DC1	52
	347	Peptidyl-prolyl cis-trans isomerase FKBP4	FKBP4_HUMAN	FKBP4	52
	348	Citrate synthase, mitochondrial	CISY_HUMAN	CS	52
	349	U1 small nuclear ribonucleoprotein 70 kDa	RU17_HUMAN	SNRNP70	52
	350	Keratin, type II cytoskeletal 7	K2C7_HUMAN	KRT7	51
	351	RuvB-like 2	RUVB2_HUMAN	RUVBL2	51
	352	Eukaryotic translation initiation factor 2 subunit 3	IF2G_HUMAN	EIF2S3	51
	353	Heterogeneous nuclear ribonucleoprotein K	HNRPK_HUMAN	HNRNPK	51
	354	BUB3-interacting and GLEBS motif-containing protein ZNF207	ZN207_HUMAN	ZNF207	51
	355	Septin-7	SEPT7_HUMAN	2016-09-07	51
	356	Lamina-associated polypeptide 2, isoforms beta/gamma	LAP2B_HUMAN	TMPO	51
	357	Rab GDP dissociation inhibitor alpha	GDIA_HUMAN	GDI1	51
	358	Rab GDP dissociation inhibitor beta	GDIB_HUMAN	GDI2	51
	359	Tumor necrosis factor receptor superfamily member 1A	TNR1A_HUMAN	TNFRSF1A	50
	360	RuvB-like 1	RUVB1_HUMAN	RUVBL1	50
	361	Adenylosuccinate synthetase isozyme 2	PURA2_HUMAN	ADSS	50
	362	Ribonuclease inhibitor	RINI_HUMAN	RNH1	50
	363	Epsilon-sarcoglycan	SGCE_HUMAN	SGCE	50
	364	Elongation factor 1-alpha 1	EF1A1_HUMAN	EEF1A1	50
	365	Elongation factor 1-alpha 2	EF1A2_HUMAN	EEF1A2	50
	366	Elongation factor 1-gamma	EF1G_HUMAN	EEF1G	50
	367	Tubulin alpha-1B chain	TBA1B_HUMAN	TUBA1B	50
	368	Tubulin alpha-1C chain	TBA1C_HUMAN	TUBA1C	50
	369	Tubulin alpha-4A chain	TBA4A_HUMAN	TUBA4A	50
	370	Tubulin beta chain	TBB5_HUMAN	TUBB	50
	371	Tubulin beta-3 chain	TBB3_HUMAN	TUBB3	50
	372	Tubulin beta-4B chain	TBB4B_HUMAN	TUBB4B	50
	373	Legumain	LGMN_HUMAN	LGMN	49
	374	Septin-11	SEP11_HUMAN	2016-09-11	49
	375	Vacuolar protein sorting-associated protein 4B	VPS4B_HUMAN	VPS4B	49
	376	Heterogeneous nuclear ribonucleoprotein H	HNRH1_HUMAN	HNRNPH1	49
	377	Eukaryotic peptide chain release factor subunit 1	ERF1_HUMAN	ETF1	49
	378	Spliceosome RNA helicase DDX39B	DX39B_HUMAN	DDX39B	49
	379	Urokinase-type plasminogen activator	UROK_HUMAN	PLAU	49
	380	26S protease regulatory subunit 4	PRS4_HUMAN	PSMC1	49
	381	26S protease regulatory subunit 6A	PRS6A_HUMAN	PSMC3	49
	382	26S protease regulatory subunit 7	PRS7_HUMAN	PSMC2	49
	383	Mitogen-activated protein kinase 8	MK08_HUMAN	MAPK8	48
	384	Farnesyl pyrophosphate synthase	FPPS_HUMAN	FDPS	48
	385	KH domain-containing, RNA-binding, signal transduction-associated protein 1	KHDR1_HUMAN	KHDRBS1	48
	386	Drebrin-like protein	DBNL_HUMAN	DBNL	48
	387	Basic leucine zipper and W2 domain-containing protein 2	BZW2_HUMAN	BZW2	48
	388	Calreticulin	CALR_HUMAN	CALR	48
	389	Protein disulfide-isomerase A6	PDIA6_HUMAN	PDIA6	48
	390	Keratin, type I cytoskeletal 18	K1C18_HUMAN	KRT18	48
	391	Basic leucine zipper and W2 domain-containing protein 1	BZW1_HUMAN	BZW1	48
	392	Testin	TES_HUMAN	TES	48
	393	Adenosylhomocysteinase	SAHH_HUMAN	AHCY	48
	394	60S ribosomal protein L4	RL4_HUMAN	RPL4	48
	395	Sequestosome-1	SQSTM_HUMAN	SQSTM1	48
	396	Thioredoxin domain-containing protein 5	TXND5_HUMAN	TXNDC5	48
	397	Aspartate aminotransferase, mitochondrial	AATM_HUMAN	GOT2	48
	398	Histone-binding protein RBBP4	RBBP4_HUMAN	RBBP4	48
	399	Histone-binding protein RBBP7	RBBP7_HUMAN	RBBP7	48
	400	Actin-like protein 6A	ACL6A_HUMAN	ACTL6A	47
	401	Actin-related protein 3	ARP3_HUMAN	ACTR3	47
	402	Gamma-enolase	ENOG_HUMAN	ENO2	47
	403	Alpha-enolase	ENOA_HUMAN	ENO1	47
	404	Multifunctional protein ADE2	PUR6_HUMAN	PAICS	47
	405	Perilipin-3	PLIN3_HUMAN	PLIN3	47
	406	Endoplasmic reticulum resident protein 44	ERP44_HUMAN	ERP44	47
	407	Eukaryotic initiation factor 4A-III	IF4A3_HUMAN	EIF4A3	47
	408	Lupus La protein	LA_HUMAN	SSB	47
	409	Alpha-1-antitrypsin	A1AT_HUMAN	SERPINA1	47
	410	Isocitrate dehydrogenase [NADP] cytoplasmic	IDHC_HUMAN	IDH1	47
	411	Platelet-activating factor acetylhydrolase IB subunit alpha	LIS1_HUMAN	PAFAH1B1	47
	412	26S protease regulatory subunit 6B	PRS6B_HUMAN	PSMC4	47
	413	26S proteasome non-ATPase regulatory subunit 11	PSD11_HUMAN	PSMD11	47
	414	Serpin H1	SERPH_HUMAN	SERPINH1	46
	415	Heterogeneous nuclear ribonucleoprotein D-like	HNRDL_HUMAN	HNRNPDL	46
	416	Secernin-1	SCRN1_HUMAN	SCRN1	46
	417	COP9 signalosome complex subunit 4	CSN4_HUMAN	COPS4	46
	418	Aspartate aminotransferase, cytoplasmic	AATC_HUMAN	GOT1	46
	419	Plasma serine protease inhibitor	IPSP_HUMAN	SERPINA5	46
	420	Heterogeneous nuclear ribonucleoprotein F	HNRPF_HUMAN	HNRNPF	46
	421	Eukaryotic initiation factor 4A-I	IF4A1_HUMAN	EIF4A1	46
	422	Eukaryotic initiation factor 4A-II	IF4A2_HUMAN	EIF4A2	46
	423	26S protease regulatory subunit 8	PRS8_HUMAN	PSMC5	46
	424	26S proteasome non-ATPase regulatory subunit 6	PSMD6_HUMAN	PSMD6	46
	425	60S ribosomal protein L3	RL3_HUMAN	RPL3	46
	426	Nucleosome assembly protein 1-like 1	NP1L1_HUMAN	NAP1L1	45
	427	Golgi membrane protein 1	GOLM1_HUMAN	GOLM1	45
	428	Poliovirus receptor	PVR_HUMAN	PVR	45
	429	Angiopoietin-related protein 4	ANGL4_HUMAN	ANGPTL4	45
	430	Plasminogen activator inhibitor 1	PAI1_HUMAN	SERPINE1	45
	431	Regulator of chromosome condensation	RCC1_HUMAN	RCC1	45
	432	Plasminogen activator inhibitor 1 RNA-binding protein	PAIRB_HUMAN	SERBP1	45
	433	DnaJ homolog subfamily A member 1	DNJA1_HUMAN	DNAJA1	45
	434	Soluble calcium-activated nucleotidase 1	CANT1_HUMAN	CANT1	45
	435	Actin-related protein 2	ARP2_HUMAN	ACTR2	45
	436	Obg-like ATPase 1	OLA1_HUMAN	OLA1	45
	437	Phosphoglycerate kinase 1	PGK1_HUMAN	PGK1	45
	438	Cathepsin D	CATD_HUMAN	CTSD	45
	439	Hsp90 co-chaperone Cdc37	CDC37_HUMAN	CDC37	44
	440	Splicing factor 3B subunit 4	SF3B4_HUMAN	SF3B4	44
	441	Dynactin subunit 2	DCTN2_HUMAN	DCTN2	44
	442	26S protease regulatory subunit 10B	PRS10_HUMAN	PSMC6	44
	443	Keratin, type I cytoskeletal 19	K1C19_HUMAN	KRT19	44
	444	Glia-derived nexin	GDN_HUMAN	SERPINE2	44
	445	Beta-1,4-galactosyltransferase 1	B4GT1_HUMAN	B4GALT1	44
	446	Proliferation-associated protein 2G4	PA2G4_HUMAN	PA2G4	44
	447	S-adenosylmethionine synthase isoform type-2	METK2_HUMAN	MAT2A	44
	448	Protein TFG	TFG_HUMAN	TFG	43
	449	Dual specificity mitogen-activated protein kinase kinase 1	MP2K1_HUMAN	MAP2K1	43
	450	Methionine aminopeptidase 1	MAP11_HUMAN	METAP1	43
	451	UV excision repair protein RAD23 homolog B	RD23B_HUMAN	RAD23B	43
	452	Interleukin enhancer-binding factor 2	ILF2_HUMAN	ILF2	43
	453	Serine protease 23	PRS23_HUMAN	PRSS23	43
	454	26S proteasome non-ATPase regulatory subunit 13	PSD13_HUMAN	PSMD13	43
	455	Nucleosome assembly protein 1-like 4	NP1L4_HUMAN	NAP1L4	43
	456	Leukocyte elastase inhibitor	ILEU_HUMAN	SERPINB1	43
	457	Protein DEK	DEK_HUMAN	DEK	43
	458	Serpin B6	SPB6_HUMAN	SERPINB6	43
	459	Alpha-centractin	ACTZ_HUMAN	ACTR1A	43
	460	Flap endonuclease 1	FEN1_HUMAN	FEN1	43
	461	N-acetyllactosaminide beta-1,3-N-acetylglucosaminyltransferase 3	B3GN3_HUMAN	B3GNT3	43
	462	RNA-binding motif protein, X chromosome	RBMX_HUMAN	RBMX	42
	463	Protein phosphatase methylesterase 1	PPME1_HUMAN	PPME1	42
	464	Fractalkine	X3CL1_HUMAN	CX3CL1	42
	465	Basigin	BASI_HUMAN	BSG	42
	466	Serpin B5	SPB5_HUMAN	SERPINB5	42
	467	Protein CYR61	CYR61_HUMAN	CYR61	42
	468	Pentraxin-related protein PTX3	PTX3_HUMAN	PTX3	42
	469	Synaptic vesicle membrane protein VAT-1 homolog	VAT1_HUMAN	VAT1	42
	470	45 kDa calcium-binding protein	CAB45_HUMAN	SDF4	42
	471	Beta-1,3-N-acetylglucosaminyltransferase lunatic fringe	LFNG_HUMAN	LFNG	42
	472	Protein arginine N-methyltransferase 1	ANM1_HUMAN	PRMT1	42
	473	Actin, alpha cardiac muscle 1	ACTC_HUMAN	ACTC1	42
	474	Actin, cytoplasmic 1	ACTB_HUMAN	ACTB	42
	475	Actin-related protein 2/3 complex subunit 1A	ARC1A_HUMAN	ARPC1A	42
	476	Septin-2	SEPT2_HUMAN	2016-09-02	41
	477	Acetyl-CoA acetyltransferase, cytosolic	THIC_HUMAN	ACAT2	41
	478	Hsc70-interacting protein	F10A1_HUMAN	ST13	41
	479	Actin-related protein 2/3 complex subunit 1B	ARC1B_HUMAN	ARPC1B	41
	480	Uroporphyrinogen decarboxylase	DCUP_HUMAN	UROD	41
	481	26S proteasome non-ATPase regulatory subunit 4	PSMD4_HUMAN	PSMD4	41
	482	Guanine nucleotide-binding protein G(k) subunit alpha	GNAI3_HUMAN	GNAI3	41
	483	Serine/threonine-protein phosphatase 2A activator	PTPA_HUMAN	PPP2R4	41
	484	NSFL1 cofactor p47	NSF1C_HUMAN	NSFL1C	41
	485	Adenosine kinase	ADK_HUMAN	ADK	41
	486	DnaJ homolog subfamily B member 11	DJB11_HUMAN	DNAJB11	41
	487	HLA class I histocompatibility antigen, A-24 alpha chain	1A24_HUMAN	HLA-A	41
	488	HLA class I histocompatibility antigen, Cw-7 alpha chain	1C07_HUMAN	HLA-C	41
	489	Guanine nucleotide-binding protein G(i) subunit alpha-2	GNAI2_HUMAN	GNAI2	40
	490	Phosphoserine aminotransferase	SERC_HUMAN	PSAT1	40
	491	Sialic acid synthase	SIAS_HUMAN	NANS	40
	492	Calcium-binding protein 39	CAB39_HUMAN	CAB39	40
	493	Vasodilator-stimulated phosphoprotein	VASP_HUMAN	VASP	40
	494	Alcohol dehydrogenase class-3	ADHX_HUMAN	ADH5	40
	495	26S proteasome non-ATPase regulatory subunit 8	PSMD8_HUMAN	PSMD8	40
	496	UV excision repair protein RAD23 homolog A	RD23A_HUMAN	RAD23A	40
	497	Heterogeneous nuclear ribonucleoprotein A3	ROA3_HUMAN	HNRNPA3	40
	498	Deoxyribonuclease-2-alpha	DNS2A_HUMAN	DNASE2	40
	499	Twinfilin-2	TWF2_HUMAN	TWF2	40
	500	ELAV-like protein 2	ELAV2_HUMAN	ELAVL2	40
	501	Y-box-binding protein 3	YBOX3_HUMAN	YBX3	40
	502	HLA class I histocompatibility antigen, B-7 alpha chain	1B07_HUMAN	HLA-B	40
	503	HLA class I histocompatibility antigen, alpha chain E	HLAE_HUMAN	HLA-E	40
	504	Alpha-2-HS-glycoprotein	FETUA_HUMAN	AHSG	39
	505	THUMP domain-containing protein 1	THUM1_HUMAN	THUMPD1	39
	506	Renin receptor	RENR_HUMAN	ATP6AP2	39
	507	Poly(ADP-ribose) glycohydrolase ARH3	ARHL2_HUMAN	ADPRHL2	39
	508	Reticulocalbin-1	RCN1_HUMAN	RCN1	39
	509	Na(+)/H(+) exchange regulatory cofactor NHE-RF1	NHRF1_HUMAN	SLC9A3R1	39
	510	Heterogeneous nuclear ribonucleoprotein A1	ROA1_HUMAN	HNRNPA1	39
	511	Annexin A1	ANXA1_HUMAN	ANXA1	39
	512	Annexin A2	ANXA2_HUMAN	ANXA2	39
	513	Fructose-bisphosphate aldolase C	ALDOC_HUMAN	ALDOC	39
	514	Fructose-bisphosphate aldolase A	ALDOA_HUMAN	ALDOA	39
	515	Poly(rC)-binding protein 3	PCBP3_HUMAN	PCBP3	39
	516	Poly(rC)-binding protein 2	PCBP2_HUMAN	PCBP2	39
	517	Macrophage-capping protein	CAPG_HUMAN	CAPG	38
	518	SUMO-activating enzyme subunit 1	SAE1_HUMAN	SAE1	38
	519	Serine-threonine kinase receptor-associated protein	STRAP_HUMAN	STRAP	38
	520	Heterogeneous nuclear ribonucleoprotein D0	HNRPD_HUMAN	HNRNPD	38
	521	Eukaryotic translation initiation factor 2 subunit 2	IF2B_HUMAN	EIF2S2	38
	522	Activator of 90 kDa heat shock protein ATPase homolog 1	AHSA1_HUMAN	AHSA1	38
	523	Nuclear migration protein nudC	NUDC_HUMAN	NUDC	38
	524	Vacuolar protein sorting-associated protein 26A	VP26A_HUMAN	VPS26A	38
	525	Connective tissue growth factor	CTGF_HUMAN	CTGF	38
	526	Follistatin	FST_HUMAN	FST	38
	527	Eukaryotic translation initiation factor 3 subunit F	EIF3F_HUMAN	EIF3F	38
	528	Transaldolase	TALDO_HUMAN	TALDO1	38
	529	Serine/threonine-protein phosphatase PP1-alpha catalytic subunit	PP1A_HUMAN	PPP1CA	38
	530	Cathepsin B	CATB_HUMAN	CTSB	38
	531	Cathepsin L1	CATL1_HUMAN	CTSL	38
	532	Poly(rC)-binding protein 1	PCBP1_HUMAN	PCBP1	37
	533	Cysteine and histidine-rich domain-containing protein 1	CHRD1_HUMAN	CHORDC1	37
	534	Glutaredoxin-3	GLRX3_HUMAN	GLRX3	37
	535	Heterogeneous nuclear ribonucleoproteins A2/B1	ROA2_HUMAN	HNRNPA2B1	37
	536	Zinc finger Ran-binding domain-containing protein 2	ZRAB2_HUMAN	ZRANB2	37
	537	Guanine nucleotide-binding protein G(I)/G(S)/G(T) subunit beta-2	GBB2_HUMAN	GNB2	37
	538	Serine/threonine-protein phosphatase PP1-beta catalytic subunit	PP1B_HUMAN	PPP1CB	37
	539	Calumenin	CALU_HUMAN	CALU	37
	540	Urokinase plasminogen activator surface receptor	UPAR_HUMAN	PLAUR	37
	541	Cyclin-dependent kinase 6	CDK6_HUMAN	CDK6	37
	542	Heterogeneous nuclear ribonucleoprotein H3	HNRH3_HUMAN	HNRNPH3	37
	543	Aldo-keto reductase family 1 member C3	AK1C3_HUMAN	AKR1C3	37
	544	Ubiquitin-like domain-containing CTD phosphatase 1	UBCP1_HUMAN	UBLCP1	37
	545	Protein FAM49B	FA49B_HUMAN	FAM49B	37
	546	Methylosome protein 50	MEP50_HUMAN	WDR77	37
	547	Alcohol dehydrogenase [NADP(+)]	AK1A1_HUMAN	AKR1A1	37
	548	Eukaryotic translation initiation factor 3 subunit I	EIF3I_HUMAN	EIF3I	37
	549	L-lactate dehydrogenase A chain	LDHA_HUMAN	LDHA	37
	550	L-lactate dehydrogenase B chain	LDHB_HUMAN	LDHB	37
	551	Malate dehydrogenase, cytoplasmic	MDHC_HUMAN	MDH1	36
	552	Calponin-3	CNN3_HUMAN	CNN3	36
	553	Heterogeneous nuclear ribonucleoprotein A/B	ROAA_HUMAN	HNRNPAB	36
	554	Apolipoprotein E	APOE_HUMAN	APOE	36
	555	Eukaryotic translation initiation factor 2 subunit 1	IF2A_HUMAN	EIF2S1	36
	556	PDZ and LIM domain protein 1	PDLI1_HUMAN	PDLIM1	36
	557	Glyceraldehyde-3-phosphate dehydrogenase	G3P_HUMAN	GAPDH	36
	558	Gamma-glutamyl hydrolase	GGH_HUMAN	GGH	36
	559	Annexin A5	ANXA5_HUMAN	ANXA5	36
	560	Nuclease-sensitive element-binding protein 1	YBOX1_HUMAN	YBX1	36
	561	Aldose reductase	ALDR_HUMAN	AKR1B1	36
	562	Tumor-associated calcium signal transducer 2	TACD2_HUMAN	TACSTD2	36
	563	Eukaryotic translation initiation factor 3 subunit G	EIF3G_HUMAN	EIF3G	36
	564	Serine/threonine-protein phosphatase 2A catalytic subunit alpha isoform	PP2AA_HUMAN	PPP2CA	36
	565	DNA-(apurinic or apyrimidinic site) lyase	APEX1_HUMAN	APEX1	36
	566	Serine/threonine-protein phosphatase CPPED1	CPPED_HUMAN	CPPED1	36
	567	Quinone oxidoreductase PIG3	QORX_HUMAN	TP53I3	36
	568	Malate dehydrogenase, mitochondrial	MDHM_HUMAN	MDH2	36
	569	Osteopontin	OSTP_HUMAN	SPP1	35
	570	Secreted frizzled-related protein 1	SFRP1_HUMAN	SFRP1	35
	571	Receptor of activated protein C kinase 1	RACK1_HUMAN	RACK1	35
	572	Tissue factor pathway inhibitor	TFPI1_HUMAN	TFPI	35
	573	Epithelial cell adhesion molecule	EPCAM_HUMAN	EPCAM	35
	574	Leucine-rich repeat-containing protein 59	LRC59_HUMAN	LRRC59	35
	575	Ribose-phosphate pyrophosphokinase 1	PRPS1_HUMAN	PRPS1	35
	576	Glyoxalase domain-containing protein 4	GLOD4_HUMAN	GLOD4	35
	577	26S proteasome non-ATPase regulatory subunit 14	PSDE_HUMAN	PSMD14	35
	578	Aminoacyl tRNA synthase complex-interacting multifunctional protein 1	AIMP1_HUMAN	AIMP1	34
	579	Actin-related protein 2/3 complex subunit 2	ARPC2_HUMAN	ARPC2	34
	580	Ribokinase	RBSK_HUMAN	RBKS	34
	581	Cyclin-dependent kinase 1	CDK1_HUMAN	CDK1	34
	582	Small glutamine-rich tetratricopeptide repeat-containing protein alpha	SGTA_HUMAN	SGTA	34
	583	Glycerol-3-phosphate phosphatase	PGP_HUMAN	PGP	34
	584	Transcription elongation factor A protein 1	TCEA1_HUMAN	TCEA1	34
	585	Adapter molecule crk	CRK_HUMAN	CRK	34
	586	Protein MEMO1	MEMO1_HUMAN	MEMO1	34
	587	Brain-specific serine protease 4	BSSP4_HUMAN	PRSS22	34
	588	Translation initiation factor eIF-2B subunit alpha	EI2BA_HUMAN	EIF2B1	34
	589	Calponin-2	CNN2_HUMAN	CNN2	34
	590	Heterogeneous nuclear ribonucleoproteins C1/C2	HNRPC_HUMAN	HNRNPC	34
	591	Anamorsin	CPIN1_HUMAN	CIAPIN1	34
	592	60S acidic ribosomal protein P0	RLA0_HUMAN	RPLP0	34
	593	60S ribosomal protein L5	RL5_HUMAN	RPL5	34
	594	Protein SET OS=Homo sapiens GN=SET PE=1 SV=3	SET_HUMAN	SET	33
	595	Biliverdin reductase A	BIEA_HUMAN	BLVRA	33
	596	UBX domain-containing protein 1	UBXN1_HUMAN	UBXN1	33
	597	Stanniocalcin-2	STC2_HUMAN	STC2	33
	598	Tumor necrosis factor receptor superfamily member 6B	TNF6B_HUMAN	TNFRSF6B	33
	599	Glucosamine-6-phosphate isomerase 1	GNPI1_HUMAN	GNPDA1	33
	600	Inorganic pyrophosphatase	IPYR_HUMAN	PPA1	33
	601	Junctional adhesion molecule A	JAM1_HUMAN	F11R	33
	602	Nucleophosmin	NPM_HUMAN	NPM1	33
	603	Proteasome assembly chaperone 1	PSMG1_HUMAN	PSMG1	33
	604	Endoribonuclease LACTB2	LACB2_HUMAN	LACTB2	33
	605	F-actin-capping protein subunit alpha-1	CAZA1_HUMAN	CAPZA1	33
	606	F-actin-capping protein subunit alpha-2	CAZA2_HUMAN	CAPZA2	33
	607	Tropomyosin alpha-1 chain	TPM1_HUMAN	TPM1	33
	608	Tropomyosin alpha-3 chain	TPM3_HUMAN	TPM3	33
	609	60S ribosomal protein L6	RL6_HUMAN	RPL6	33
	610	40S ribosomal protein SA	RSSA_HUMAN	RPSA	33
	611	Syndecan-1	SDC1_HUMAN	SDC1	32
	612	Syntenin-1	SDCB1_HUMAN	SDCBP	32
	613	Thioredoxin-like protein 1	TXNL1_HUMAN	TXNL1	32
	614	Purine nucleoside phosphorylase	PNPH_HUMAN	PNP	32
	615	Myristoylated alanine-rich C-kinase substrate	MARCS_HUMAN	MARCKS	32
	616	Calretinin	CALB2_HUMAN	CALB2	32
	617	Phosphatidylinositol transfer protein beta isoform	PIPNB_HUMAN	PITPNB	32
	618	Complement component 1 Q subcomponent-binding protein, mitochondrial	C1QBP_HUMAN	C1QBP	31
	619	F-actin-capping protein subunit beta	CAPZB_HUMAN	CAPZB	31
	620	Ubiquitin thioesterase OTUB1	OTUB1_HUMAN	OTUB1	31
	621	U1 small nuclear ribonucleoprotein A	SNRPA_HUMAN	SNRPA	31
	622	S-methyl-5'-thioadenosine phosphorylase	MTAP_HUMAN	MTAP	31
	623	Elongation factor 1-delta	EF1D_HUMAN	EEF1D	31
	624	N(G),N(G)-dimethylarginine dimethylaminohydrolase 1	DDAH1_HUMAN	DDAH1	31
	625	NAD(P)H dehydrogenase [quinone] 1	NQO1_HUMAN	NQO1	31
	626	Triosephosphate isomerase	TPIS_HUMAN	TPI1	31
	627	Acidic leucine-rich nuclear phosphoprotein 32 family member E	AN32E_HUMAN	ANP32E	31
	628	Out at first protein homolog	OAF_HUMAN	OAF	31
	629	Intercellular adhesion molecule 2	ICAM2_HUMAN	ICAM2	31
	630	Omega-amidase NIT2	NIT2_HUMAN	NIT2	31
	631	Peroxiredoxin-4	PRDX4_HUMAN	PRDX4	31
	632	40S ribosomal protein S2	RS2_HUMAN	RPS2	31
	633	Carbonyl reductase [NADPH] 1	CBR1_HUMAN	CBR1	30
	634	Integral membrane protein 2B	ITM2B_HUMAN	ITM2B	30
	635	Inositol monophosphatase 1	IMPA1_HUMAN	IMPA1	30
	636	Kallikrein-10	KLK10_HUMAN	KLK10	30
	637	DCN1-like protein 1	DCNL1_HUMAN	DCUN1D1	30
	638	Catechol O-methyltransferase	COMT_HUMAN	COMT	30
	639	Microtubule-associated protein RP/EB family member 1	MARE1_HUMAN	MAPRE1	30
	640	LIM and SH3 domain protein 1	LASP1_HUMAN	LASP1	30
	641	Pyridoxine-5'-phosphate oxidase	PNPO_HUMAN	PNPO	30
	642	DnaJ homolog subfamily C member 8	DNJC8_HUMAN	DNAJC8	30
	643	DnaJ homolog subfamily C member 9	DNJC9_HUMAN	DNAJC9	30
	644	Proteasome activator complex subunit 3	PSME3_HUMAN	PSME3	30
	645	Proteasome subunit alpha type-1	PSA1_HUMAN	PSMA1	30
	646	Proteasome subunit beta type-7	PSB7_HUMAN	PSMB7	30
	647	60S ribosomal protein L7a	RL7A_HUMAN	RPL7A	30
	648	40S ribosomal protein S3a	RS3A_HUMAN	RPS3A	30
	649	40S ribosomal protein S4, X isoform	RS4X_HUMAN	RPS4X	30
	650	Dickkopf-related protein 1	DKK1_HUMAN	DKK1	29
	651	Acidic leucine-rich nuclear phosphoprotein 32 family member A	AN32A_HUMAN	ANP32A	29
	652	Synaptophysin-like protein 1	SYPL1_HUMAN	SYPL1	29
	653	Tropomyosin alpha-4 chain	TPM4_HUMAN	TPM4	29
	654	14-3-3 protein epsilon	1433E_HUMAN	YWHAE	29
	655	Eukaryotic translation initiation factor 3 subunit J	EIF3J_HUMAN	EIF3J	29
	656	Endoplasmic reticulum resident protein 29	ERP29_HUMAN	ERP29	29
	657	Emerin	EMD_HUMAN	EMD	29
	658	Enolase-phosphatase E1	ENOPH_HUMAN	ENOPH1	29
	659	Phosphoglycerate mutase 1	PGAM1_HUMAN	PGAM1	29
	660	Acidic leucine-rich nuclear phosphoprotein 32 family member B	AN32B_HUMAN	ANP32B	29
	661	Chloride intracellular channel protein 4	CLIC4_HUMAN	CLIC4	29
	662	Proliferating cell nuclear antigen	PCNA_HUMAN	PCNA	29
	663	Ribosome maturation protein SBDS	SBDS_HUMAN	SBDS	29
	664	Proteasome activator complex subunit 1	PSME1_HUMAN	PSME1	29
	665	Proteasome assembly chaperone 2	PSMG2_HUMAN	PSMG2	29
	666	Proteasome subunit alpha type-4	PSA4_HUMAN	PSMA4	29
	667	Proteasome subunit beta type-4	PSB4_HUMAN	PSMB4	29
	668	60S ribosomal protein L7	RL7_HUMAN	RPL7	29
	669	40S ribosomal protein S6	RS6_HUMAN	RPS6	29
	670	Calpain small subunit 1	CPNS1_HUMAN	CAPNS1	28
	671	Serine/arginine-rich splicing factor 1	SRSF1_HUMAN	SRSF1	28
	672	Thioredoxin-dependent peroxide reductase, mitochondrial	PRDX3_HUMAN	PRDX3	28
	673	Major prion protein	PRIO_HUMAN	PRNP	28
	674	Glutathione S-transferase omega-1	GSTO1_HUMAN	GSTO1	28
	675	Voltage-dependent calcium channel gamma-6 subunit	CCG6_HUMAN	CACNG6	28
	676	Insulin-like growth factor-binding protein 4	IBP4_HUMAN	IGFBP4	28
	677	Amphiregulin	AREG_HUMAN	AREG	28
	678	Vesicle-associated membrane protein-associated protein A	VAPA_HUMAN	VAPA	28
	679	14-3-3 protein beta/alpha	1433B_HUMAN	YWHAB	28
	680	14-3-3 protein gamma	1433G_HUMAN	YWHAG	28
	681	14-3-3 protein zeta/delta	1433Z_HUMAN	YWHAZ	28
	682	14-3-3 protein eta	1433F_HUMAN	YWHAH	28
	683	14-3-3 protein theta	1433T_HUMAN	YWHAQ	28
	684	14-3-3 protein sigma	1433S_HUMAN	SFN	28
	685	Proteasome subunit alpha type-3	PSA3_HUMAN	PSMA3	28
	686	Proteasome subunit alpha type-7	PSA7_HUMAN	PSMA7	28
	687	Proteasome subunit beta type-5	PSB5_HUMAN	PSMB5	28
	688	60S ribosomal protein L8	RL8_HUMAN	RPL8	28
	689	Proteasome activator complex subunit 2	PSME2_HUMAN	PSME2	27
	690	Proteasome subunit alpha type-6	PSA6_HUMAN	PSMA6	27
	691	Eukaryotic translation initiation factor 4H	IF4H_HUMAN	EIF4H	27
	692	NKG2D ligand 2	N2DL2_HUMAN	ULBP2	27
	693	Protein CDV3 homolog	CDV3_HUMAN	CDV3	27
	694	Tubulin-folding cofactor B	TBCB_HUMAN	TBCB	27
	695	Clathrin light chain A	CLCA_HUMAN	CLTA	27
	696	Vascular endothelial growth factor A	VEGFA_HUMAN	VEGFA	27
	697	Chloride intracellular channel protein 1	CLIC1_HUMAN	CLIC1	27
	698	THO complex subunit 4	THOC4_HUMAN	ALYREF	27
	699	Kallikrein-6	KLK6_HUMAN	KLK6	27
	700	Hepatoma-derived growth factor	HDGF_HUMAN	HDGF	27
	701	EF-hand domain-containing protein D2	EFHD2_HUMAN	EFHD2	27
	702	Eukaryotic translation initiation factor 6	IF6_HUMAN	EIF6	27
	703	Deoxyuridine 5'-triphosphate nucleotidohydrolase, mitochondrial	DUT_HUMAN	DUT	27
	704	40S ribosomal protein S3	RS3_HUMAN	RPS3	27
	705	Thymocyte nuclear protein 1	THYN1_HUMAN	THYN1	26
	706	Trypsin-2	TRY2_HUMAN	PRSS2	26
	707	Adenylate kinase 2, mitochondrial	KAD2_HUMAN	AK2	26
	708	N-alpha-acetyltransferase 10	NAA10_HUMAN	NAA10	26
	709	Proteasome subunit alpha type-5	PSA5_HUMAN	PSMA5	26
	710	Isopentenyl-diphosphate Delta-isomerase 1	IDI1_HUMAN	IDI1	26
	711	Tetraspanin-1	TSN1_HUMAN	TSPAN1	26
	712	Fibroblast growth factor-binding protein 1	FGFP1_HUMAN	FGFBP1	26
	713	Cleavage and polyadenylation specificity factor subunit 5	CPSF5_HUMAN	NUDT21	26
	714	Methylosome subunit pICln	ICLN_HUMAN	CLNS1A	26
	715	Calcyclin-binding protein	CYBP_HUMAN	CACYBP	26
	716	Translin	TSN_HUMAN	TSN	26
	717	Ubiquitin carboxyl-terminal hydrolase isozyme L3	UCHL3_HUMAN	UCHL3	26
	718	Galectin-3	LEG3_HUMAN	LGALS3	26
	719	Extracellular superoxide dismutase [Cu-Zn]	SODE_HUMAN	SOD3	26
	720	Coiled-coil domain-containing protein 124	CC124_HUMAN	CCDC124	26
	721	CD81 antigen	CD81_HUMAN	CD81	26
	722	Platelet-activating factor acetylhydrolase IB subunit beta	PA1B2_HUMAN	PAFAH1B2	26
	723	Platelet-activating factor acetylhydrolase IB subunit gamma	PA1B3_HUMAN	PAFAH1B3	26
	724	Proteasome subunit alpha type-2	PSA2_HUMAN	PSMA2	26
	725	Proteasome subunit beta type-1	PSB1_HUMAN	PSMB1	26
	726	Serine/arginine-rich splicing factor 9	SRSF9_HUMAN	SRSF9	26
	727	Serine/arginine-rich splicing factor 2	SRSF2_HUMAN	SRSF2	25
	728	CD9 antigen	CD9_HUMAN	CD9	25
	729	Proteasome subunit beta type-6	PSB6_HUMAN	PSMB6	25
	730	Insulin-like growth factor-binding protein 6	IBP6_HUMAN	IGFBP6	25
	731	Clathrin light chain B	CLCB_HUMAN	CLTB	25
	732	Peptidyl-prolyl cis-trans isomerase FKBP3	FKBP3_HUMAN	FKBP3	25
	733	Peroxiredoxin-6	PRDX6_HUMAN	PRDX6	25
	734	Twisted gastrulation protein homolog 1	TWSG1_HUMAN	TWSG1	25
	735	Charged multivesicular body protein 4b	CHM4B_HUMAN	CHMP4B	25
	736	High mobility group protein B1	HMGB1_HUMAN	HMGB1	25
	737	Hypoxanthine-guanine phosphoribosyltransferase	HPRT_HUMAN	HPRT1	25
	738	Elongation factor 1-beta	EF1B_HUMAN	EEF1B2	25
	739	26S proteasome non-ATPase regulatory subunit 9	PSMD9_HUMAN	PSMD9	25
	740	Protein FAM3C	FAM3C_HUMAN	FAM3C	25
	741	Acyl-protein thioesterase 1	LYPA1_HUMAN	LYPLA1	25
	742	Protein-L-isoaspartate(D-aspartate) O-methyltransferase	PIMT_HUMAN	PCMT1	25
	743	Small nuclear ribonucleoprotein-associated proteins B and B'	RSMB_HUMAN	SNRPB	25
	744	60S ribosomal protein L10	RL10_HUMAN	RPL10	25
	745	60S ribosomal protein L10a	RL10A_HUMAN	RPL10A	25
	746	26S proteasome non-ATPase regulatory subunit 10	PSD10_HUMAN	PSMD10	24
	747	GTP-binding nuclear protein Ran	RAN_HUMAN	RAN	24
	748	Metalloproteinase inhibitor 2	TIMP2_HUMAN	TIMP2	24
	749	ADP-sugar pyrophosphatase	NUDT5_HUMAN	NUDT5	24
	750	Tumor protein D52	TPD52_HUMAN	TPD52	24
	751	PITH domain-containing protein 1	PITH1_HUMAN	PITHD1	24
	752	High mobility group protein B2	HMGB2_HUMAN	HMGB2	24
	753	Osteoclast-stimulating factor 1	OSTF1_HUMAN	OSTF1	24
	754	Ephrin-A1	EFNA1_HUMAN	EFNA1	24
	755	Peptidyl-prolyl cis-trans isomerase B	PPIB_HUMAN	PPIB	24
	756	Ras-related protein Rab-11A	RB11A_HUMAN	RAB11A	24
	757	Ras-related protein Ral-A	RALA_HUMAN	RALA	24
	758	60S ribosomal protein L13	RL13_HUMAN	RPL13	24
	759	60S ribosomal protein L13a	RL13A_HUMAN	RPL13A	24
	760	60S ribosomal protein L15	RL15_HUMAN	RPL15	24
	761	40S ribosomal protein S8	RS8_HUMAN	RPS8	24
	762	Cilia- and flagella-associated protein 20	CFA20_HUMAN	CFAP20	23
	763	Prefoldin subunit 3	PFD3_HUMAN	VBP1	23
	764	7,8-dihydro-8-oxoguanine triphosphatase	8ODP_HUMAN	NUDT1	23
	765	D-tyrosyl-tRNA(Tyr) deacylase 1	DTD1_HUMAN	DTD1	23
	766	Ran-specific GTPase-activating protein	RANG_HUMAN	RANBP1	23
	767	Metalloproteinase inhibitor 1	TIMP1_HUMAN	TIMP1	23
	768	High mobility group protein B3	HMGB3_HUMAN	HMGB3	23
	769	Proteasome subunit beta type-2	PSB2_HUMAN	PSMB2	23
	770	Proteasome subunit beta type-3	PSB3_HUMAN	PSMB3	23
	771	Proteasome subunit beta type-9	PSB9_HUMAN	PSMB9	23
	772	Ras-related protein Rab-1A	RAB1A_HUMAN	RAB1A	23
	773	Ras-related protein Rab-7a	RAB7A_HUMAN	RAB7A	23
	774	Ras-related protein Rab-10	RAB10_HUMAN	RAB10	23
	775	Rho GDP-dissociation inhibitor 1	GDIR1_HUMAN	ARHGDIA	23
	776	Rho GDP-dissociation inhibitor 2	GDIR2_HUMAN	ARHGDIB	23
	777	60S ribosomal protein L14	RL14_HUMAN	RPL14	23
	778	60S ribosomal protein L19	RL19_HUMAN	RPL19	23
	779	40S ribosomal protein S5	RS5_HUMAN	RPS5	23
	780	40S ribosomal protein S9	RS9_HUMAN	RPS9	23
	781	Ubiquitin-conjugating enzyme E2 K	UBE2K_HUMAN	UBE2K	22
	782	Transgelin-2	TAGL2_HUMAN	TAGLN2	22
	783	Interleukin-18	IL18_HUMAN	IL18	22
	784	Hippocalcin-like protein 1	HPCL1_HUMAN	HPCAL1	22
	785	Tumor protein D54	TPD54_HUMAN	TPD52L2	22
	786	Chromobox protein homolog 5	CBX5_HUMAN	CBX5	22
	787	UMP-CMP kinase	KCY_HUMAN	CMPK1	22
	788	Transcription factor BTF3	BTF3_HUMAN	BTF3	22
	789	Adenylate kinase isoenzyme 1	KAD1_HUMAN	AK1	22
	790	Flavin reductase (NADPH)	BLVRB_HUMAN	BLVRB	22
	791	Peroxiredoxin-1	PRDX1_HUMAN	PRDX1	22
	792	Charged multivesicular body protein 1b	CHM1B_HUMAN	CHMP1B	22
	793	Density-regulated protein	DENR_HUMAN	DENR	22
	794	Peroxiredoxin-5, mitochondrial	PRDX5_HUMAN	PRDX5	22
	795	Claudin-4	CLD4_HUMAN	CLDN4	22
	796	Peroxiredoxin-2	PRDX2_HUMAN	PRDX2	22
	797	Transforming protein RhoA	RHOA_HUMAN	RHOA	22
	798	Charged multivesicular body protein 1a	CHM1A_HUMAN	CHMP1A	22
	799	Sorcin	SORCN_HUMAN	SRI	22
	800	Syndecan-4	SDC4_HUMAN	SDC4	22
	801	60S ribosomal protein L18	RL18_HUMAN	RPL18	22
	802	40S ribosomal protein S7	RS7_HUMAN	RPS7	22
	803	Protein LZIC	LZIC_HUMAN	LZIC	21
	804	Ras-related C3 botulinum toxin substrate 1	RAC1_HUMAN	RAC1	21
	805	Cell division control protein 42 homolog	CDC42_HUMAN	CDC42	21
	806	Ferritin heavy chain	FRIH_HUMAN	FTH1	21
	807	Heme-binding protein 1	HEBP1_HUMAN	HEBP1	21
	808	Phosphatidylethanolamine-binding protein 1	PEBP1_HUMAN	PEBP1	21
	809	Gamma-glutamylcyclotransferase	GGCT_HUMAN	GGCT	21
	810	NEDD8-conjugating enzyme Ubc12	UBC12_HUMAN	UBE2M	21
	811	Ras-related protein Rap-1b	RAP1B_HUMAN	RAP1B	21
	812	Chromobox protein homolog 3	CBX3_HUMAN	CBX3	21
	813	Lactoylglutathione lyase	LGUL_HUMAN	GLO1	21
	814	Glucosamine 6-phosphate N-acetyltransferase	GNA1_HUMAN	GNPNAT1	21
	815	Mesencephalic astrocyte-derived neurotrophic factor	MANF_HUMAN	MANF	21
	816	ADP-ribosylation factor 1	ARF1_HUMAN	ARF1	21
	817	Ubiquitin-conjugating enzyme E2 H	UBE2H_HUMAN	UBE2H	21
	818	Protein canopy homolog 2	CNPY2_HUMAN	CNPY2	21
	819	28 kDa heat- and acid-stable phosphoprotein	HAP28_HUMAN	PDAP1	21
	820	Cysteine and glycine-rich protein 1	CSRP1_HUMAN	CSRP1	21
	821	Malignant T-cell-amplified sequence 1	MCTS1_HUMAN	MCTS1	21
	822	Actin-related protein 2/3 complex subunit 3	ARPC3_HUMAN	ARPC3	21
	823	Vacuolar protein sorting-associated protein 29	VPS29_HUMAN	VPS29	21
	824	60S ribosomal protein L17	RL17_HUMAN	RPL17	21
	825	60S ribosomal protein L18a	RL18A_HUMAN	RPL18A	21
	826	Caveolin-1	CAV1_HUMAN	CAV1	20
	827	Small acidic protein	SMAP_HUMAN	SMAP	20
	828	Hematological and neurological expressed 1-like protein	HN1L_HUMAN	HN1L	20
	829	Deoxycytidylate deaminase	DCTD_HUMAN	DCTD	20
	830	Anterior gradient protein 2 homolog	AGR2_HUMAN	AGR2	20
	831	Protein deglycase DJ-1	PARK7_HUMAN	PARK7	20
	832	RNA-binding protein 8A	RBM8A_HUMAN	RBM8A	20
	833	Myosin regulatory light chain 12A	ML12A_HUMAN	MYL12A	20
	834	Centrin-2	CETN2_HUMAN	CETN2	20
	835	Actin-related protein 2/3 complex subunit 4	ARPC4_HUMAN	ARPC4	20
	836	Translationally-controlled tumor protein	TCTP_HUMAN	TPT1	20
	837	MARCKS-related protein	MRP_HUMAN	MARCKSL1	20
	838	60S ribosomal protein L11	RL11_HUMAN	RPL11	20
	839	Cellular nucleic acid-binding protein	CNBP_HUMAN	CNBP	19
	840	Neuroblastoma suppressor of tumorigenicity 1	NBL1_HUMAN	NBL1	19
	841	Serine/arginine-rich splicing factor 3	SRSF3_HUMAN	SRSF3	19
	842	Calcineurin subunit B type 1	CANB1_HUMAN	PPP3R1	19
	843	Peptidyl-prolyl cis-trans isomerase H	PPIH_HUMAN	PPIH	19
	844	Thioredoxin domain-containing protein 12	TXD12_HUMAN	TXNDC12	19
	845	Protein CutA	CUTA_HUMAN	CUTA	19
	846	Proepiregulin	EREG_HUMAN	EREG	19
	847	PEST proteolytic signal-containing nuclear protein	PCNP_HUMAN	PCNP	19
	848	Cofilin-2	COF2_HUMAN	CFL2	19
	849	Prostaglandin E synthase 3	TEBP_HUMAN	PTGES3	19
	850	S-phase kinase-associated protein 1	SKP1_HUMAN	SKP1	19
	851	Cold-inducible RNA-binding protein	CIRBP_HUMAN	CIRBP	19
	852	60S ribosomal protein L21	RL21_HUMAN	RPL21	19
	853	40S ribosomal protein S10	RS10_HUMAN	RPS10	19
	854	Destrin	DEST_HUMAN	DSTN	19
	855	Cofilin-1	COF1_HUMAN	CFL1	19
	856	Peptidyl-prolyl cis-trans isomerase-like 1	PPIL1_HUMAN	PPIL1	18
	857	UPF0587 protein C1orf123	CA123_HUMAN	C1orf123	18
	858	Low molecular weight phosphotyrosine protein phosphatase	PPAC_HUMAN	ACP1	18
	859	Peptidyl-prolyl cis-trans isomerase A	PPIA_HUMAN	PPIA	18
	860	SUMO-conjugating enzyme UBC9	UBC9_HUMAN	UBE2I	18
	861	Ubiquitin-40S ribosomal protein S27a	RS27A_HUMAN	RPS27A	18
	862	Ubiquitin-conjugating enzyme E2 L3	UB2L3_HUMAN	UBE2L3	18
	863	60S ribosomal protein L12	RL12_HUMAN	RPL12	18
	864	60S ribosomal protein L24	RL24_HUMAN	RPL24	18
	865	60S ribosomal protein L23a	RL23A_HUMAN	RPL23A	18
	866	60S ribosomal protein L29	RL29_HUMAN	RPL29	18
	867	40S ribosomal protein S11	RS11_HUMAN	RPS11	18
	868	40S ribosomal protein S18	RS18_HUMAN	RPS18	18
	869	U1 small nuclear ribonucleoprotein C	RU1C_HUMAN	SNRPC	17
	870	Prefoldin subunit 5	PFD5_HUMAN	PFDN5	17
	871	Stathmin	STMN1_HUMAN	STMN1	17
	872	Protein mago nashi homolog 2	MGN2_HUMAN	MAGOHB	17
	873	RNA-binding protein 3	RBM3_HUMAN	RBM3	17
	874	Myosin light polypeptide 6	MYL6_HUMAN	MYL6	17
	875	DNA polymerase epsilon subunit 3	DPOE3_HUMAN	POLE3	17
	876	Calmodulin	CALM_HUMAN	CALM1	17
	877	Eukaryotic translation initiation factor 5A-1	IF5A1_HUMAN	EIF5A	17
	878	Prefoldin subunit 2	PFD2_HUMAN	PFDN2	17
	879	Epididymal secretory protein E1	NPC2_HUMAN	NPC2	17
	880	Nucleoside diphosphate kinase A	NDKA_HUMAN	NME1	17
	881	Nucleoside diphosphate kinase B	NDKB_HUMAN	NME2	17
	882	Ubiquitin-conjugating enzyme E2 A	UBE2A_HUMAN	UBE2A	17
	883	Ubiquitin-conjugating enzyme E2 N	UBE2N_HUMAN	UBE2N	17
	884	Ubiquitin-conjugating enzyme E2 D2	UB2D2_HUMAN	UBE2D2	17
	885	60S ribosomal protein L27a	RL27A_HUMAN	RPL27A	17
	886	40S ribosomal protein S13	RS13_HUMAN	RPS13	17
	887	Ubiquitin-conjugating enzyme E2 variant 1	UB2V1_HUMAN	UBE2V1	16
	888	Ubiquitin-conjugating enzyme E2 variant 2	UB2V2_HUMAN	UBE2V2	16
	889	Eukaryotic translation initiation factor 1A, X-chromosomal	IF1AX_HUMAN	EIF1AX	16
	890	Endothelial differentiation-related factor 1	EDF1_HUMAN	EDF1	16
	891	Actin-related protein 2/3 complex subunit 5	ARPC5_HUMAN	ARPC5	16
	892	Hematological and neurological expressed 1 protein	HN1_HUMAN	HN1	16
	893	Coactosin-like protein	COTL1_HUMAN	COTL1	16
	894	Superoxide dismutase [Cu-Zn]	SODC_HUMAN	SOD1	16
	895	Protein phosphatase 1 regulatory subunit 14B	PP14B_HUMAN	PPP1R14B	16
	896	Calcium-regulated heat-stable protein 1	CHSP1_HUMAN	CARHSP1	16
	897	Putative peptidyl-tRNA hydrolase PTRHD1	PTRD1_HUMAN	PTRHD1	16
	898	Cystatin-C	CYTC_HUMAN	CST3	16
	899	Cellular retinoic acid-binding protein 2	RABP2_HUMAN	CRABP2	16
	900	Peptidyl-prolyl cis-trans isomerase FKBP2	FKBP2_HUMAN	FKBP2	16
	901	Midkine	MK_HUMAN	MDK	16
	902	Coiled-coil-helix-coiled-coil-helix domain-containing protein 2	CHCH2_HUMAN	CHCHD2	16
	903	Histone H3.1t	H31T_HUMAN	HIST3H3	16
	904	60S ribosomal protein L27	RL27_HUMAN	RPL27	16
	905	60S ribosomal protein L28	RL28_HUMAN	RPL28	16
	906	60S ribosomal protein L32	RL32_HUMAN	RPL32	16
	907	40S ribosomal protein S14	RS14_HUMAN	RPS14	16
	908	40S ribosomal protein S16	RS16_HUMAN	RPS16	16
	909	40S ribosomal protein S17	RS17_HUMAN	RPS17	16
	910	40S ribosomal protein S19	RS19_HUMAN	RPS19	16
	911	Fatty acid-binding protein, epidermal	FABP5_HUMAN	FABP5	15
	912	Profilin-1	PROF1_HUMAN	PFN1	15
	913	Galectin-1	LEG1_HUMAN	LGALS1	15
	914	Huntingtin-interacting protein K	HYPK_HUMAN	HYPK	15
	915	Signal recognition particle 14 kDa protein	SRP14_HUMAN	SRP14	15
	916	Prefoldin subunit 4	PFD4_HUMAN	PFDN4	15
	917	Prefoldin subunit 6	PFD6_HUMAN	PFDN6	15
	918	60S ribosomal protein L22	RL22_HUMAN	RPL22	15
	919	60S ribosomal protein L23	RL23_HUMAN	RPL23	15
	920	60S ribosomal protein L35	RL35_HUMAN	RPL35	15
	921	40S ribosomal protein S12	RS12_HUMAN	RPS12	15
	922	40S ribosomal protein S15a	RS15A_HUMAN	RPS15A	15
	923	40S ribosomal protein S24	RS24_HUMAN	RPS24	15
	924	Nuclear transport factor 2	NTF2_HUMAN	NUTF2	14
	925	Activated RNA polymerase II transcriptional coactivator p15	TCP4_HUMAN	SUB1	14
	926	Programmed cell death protein 5	PDCD5_HUMAN	PDCD5	14
	927	CD59 glycoprotein	CD59_HUMAN	CD59	14
	928	Thioredoxin domain-containing protein 17	TXD17_HUMAN	TXNDC17	14
	929	Small nuclear ribonucleoprotein Sm D3	SMD3_HUMAN	SNRPD3	14
	930	Tumor necrosis factor receptor superfamily member 12A	TNR12_HUMAN	TNFRSF12A	14
	931	Histone H2A type 1-B/E	H2A1B_HUMAN	HIST1H2AB	14
	932	Histone H2B type 1-B	H2B1B_HUMAN	HIST1H2BB	14
	933	Histone H2B type 1-C/E/F/G/I	H2B1C_HUMAN	HIST1H2BC	14
	934	14 kDa phosphohistidine phosphatase	PHP14_HUMAN	PHPT1	14
	935	Peptidyl-prolyl cis-trans isomerase NIMA-interacting 4	PIN4_HUMAN	PIN4	14
	936	Histidine triad nucleotide-binding protein 1	HINT1_HUMAN	HINT1	14
	937	Tax1-binding protein 3	TX1B3_HUMAN	TAX1BP3	14
	938	Beta-2-microglobulin	B2MG_HUMAN	B2M	14
	939	Replication protein A 14 kDa subunit	RFA3_HUMAN	RPA3	14
	940	Small nuclear ribonucleoprotein Sm D2	SMD2_HUMAN	SNRPD2	14
	941	60S ribosomal protein L31	RL31_HUMAN	RPL31	14
	942	40S ribosomal protein S25	RS25_HUMAN	RPS25	14
	943	Transcription elongation factor B polypeptide 2	ELOB_HUMAN	TCEB2	13
	944	WAP four-disulfide core domain protein 2	WFDC2_HUMAN	WFDC2	13
	945	Myotrophin	MTPN_HUMAN	MTPN	13
	946	Tubulin-specific chaperone A	TBCA_HUMAN	TBCA	13
	947	Eukaryotic translation initiation factor 1	EIF1_HUMAN	EIF1	13
	948	D-dopachrome decarboxylase	DOPD_HUMAN	DDT	13
	949	60S ribosomal protein L30	RL30_HUMAN	RPL30	13
	950	60S ribosomal protein L34	RL34_HUMAN	RPL34	13
	951	60S ribosomal protein L35a	RL35A_HUMAN	RPL35A	13
	952	40S ribosomal protein S20	RS20_HUMAN	RPS20	13
	953	40S ribosomal protein S26	RS26_HUMAN	RPS26	13
	954	Macrophage migration inhibitory factor	MIF_HUMAN	MIF	12
	955	Transcription elongation factor B polypeptide 1	ELOC_HUMAN	TCEB1	12
	956	cAMP-regulated phosphoprotein 19	ARP19_HUMAN	ARPP19	12
	957	E3 ubiquitin-protein ligase RBX1	RBX1_HUMAN	RBX1	12
	958	Enhancer of rudimentary homolog	ERH_HUMAN	ERH	12
	959	Prothymosin alpha	PTMA_HUMAN	PTMA	12
	960	Pterin-4-alpha-carbinolamine dehydratase	PHS_HUMAN	PCBD1	12
	961	Peptidyl-prolyl cis-trans isomerase FKBP1A	FKB1A_HUMAN	FKBP1A	12
	962	U6 snRNA-associated Sm-like protein LSm3	LSM3_HUMAN	LSM3	12
	963	Protein S100-A16	S10AG_HUMAN	S100A16	12
	964	Cytochrome c	CYC_HUMAN	CYCS	12
	965	Protein S100-A11	S10AB_HUMAN	S100A11	12
	966	Thioredoxin	THIO_HUMAN	TXN	12
	967	U6 snRNA-associated Sm-like protein LSm7	LSM7_HUMAN	LSM7	12
	968	Parathymosin	PTMS_HUMAN	PTMS	12
	969	60S acidic ribosomal protein P1	RLA1_HUMAN	RPLP1	12
	970	60S acidic ribosomal protein P2	RLA2_HUMAN	RPLP2	12
	971	60S ribosomal protein L36	RL36_HUMAN	RPL36	12
	972	Protein S100-A13	S10AD_HUMAN	S100A13	11
	973	Histone H4	H4_HUMAN	HIST1H4A	11
	974	Acylphosphatase-1	ACYP1_HUMAN	ACYP1	11
	975	Protein dpy-30 homolog	DPY30_HUMAN	DPY30	11
	976	Protein S100-A10	S10AA_HUMAN	S100A10	11
	977	Cystatin-B	CYTB_HUMAN	CSTB	11
	978	Interleukin-8	IL8_HUMAN	CXCL8	11
	979	10 kDa heat shock protein, mitochondrial	CH10_HUMAN	HSPE1	11
	980	Dynein light chain roadblock-type 1	DLRB1_HUMAN	DYNLRB1	11
	981	Small ubiquitin-related modifier 2	SUMO2_HUMAN	SUMO2	11
	982	U6 snRNA-associated Sm-like protein LSm2	LSM2_HUMAN	LSM2	11
	983	Small nuclear ribonucleoprotein E	RUXE_HUMAN	SNRPE	11
	984	Mitochondrial import inner membrane translocase subunit Tim13	TIM13_HUMAN	TIMM13	11
	985	SH3 domain-binding glutamic acid-rich-like protein 3	SH3L3_HUMAN	SH3BGRL3	10
	986	U6 snRNA-associated Sm-like protein LSm8	LSM8_HUMAN	LSM8	10
	987	Mitochondrial import inner membrane translocase subunit Tim9	TIM9_HUMAN	TIMM9	10
	988	Dynein light chain 1, cytoplasmic	DYL1_HUMAN	DYNLL1	10
	989	Dynein light chain 2, cytoplasmic	DYL2_HUMAN	DYNLL2	10
	990	Protein S100-A6	S10A6_HUMAN	S100A6	10
	991	BolA-like protein 2	BOLA2_HUMAN	BOLA2	10
	992	Signal recognition particle 9 kDa protein	SRP09_HUMAN	SRP9	10
	993	Barrier-to-autointegration factor	BAF_HUMAN	BANF1	10
	994	Acyl-CoA-binding protein	ACBP_HUMAN	DBI	10
	995	Small nuclear ribonucleoprotein F	RUXF_HUMAN	SNRPF	10
	996	Cyclin-dependent kinases regulatory subunit 1	CKS1_HUMAN	CKS1B	10
	997	60S ribosomal protein L37a	RL37A_HUMAN	RPL37A	10
	998	NEDD8	NEDD8_HUMAN	NEDD8	9
	999	Heat shock factor-binding protein 1	HSBP1_HUMAN	HSBP1	9
	1000	Cysteine-rich protein 1	CRIP1_HUMAN	CRIP1	9
	1001	40S ribosomal protein S21	RS21_HUMAN	RPS21	9
	1002	40S ribosomal protein S27-like	RS27L_HUMAN	RPS27L	9
	1003	40S ribosomal protein S28	RS28_HUMAN	RPS28	8
	1004	Adipogenesis regulatory factor	ADIRF_HUMAN	ADIRF	8
	1005	Guanine nucleotide-binding protein G(I)/G(S)/G(O) subunit gamma-5	GBG5_HUMAN	GNG5	7
	1006	Cytochrome c oxidase copper chaperone	COX17_HUMAN	COX17	7
	1007	Metallothionein-2	MT2_HUMAN	MT2A	6
